# Supplementary material for: Coastal Garbage Patches: Fronts Accumulate Plastic Films at Ashmore Reef Marine Park (Pulau Pasir), Australia
Source: Frontiers journal article supplement (doi:10.3389/fmars.2021.613399), 2021-04-13
Supplement: Data_Sheet_1.docx [file Data_Sheet_1.docx]

**Supplementary Information**

**Figure S1.**


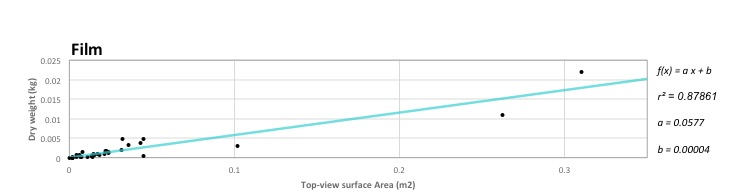


Figure S1 Predictive functions for plastic debris mass based on film subtype and top-view area. A linear regression is plotted against dry weight x top-view area measurements of objects collected during snorkelling surveys at Ashmore Reef (Pulau Pasir)

**Figure S2.**

**
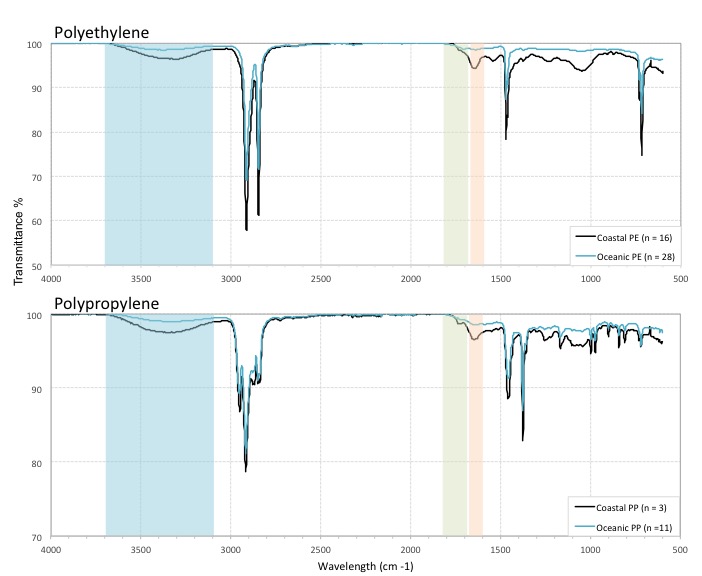
**

Figure S2 FT-IR spectra for Polyethylene and Propylene found at Ashmore Reef (Pulau Pasir) in black overlayed with spectra from the GPGP, showing similar peaks.
